# Supplementary material
Source: PubMed Central journal article supplement (PMC7809487)

**Supplementary Figure 1: Complete Compilation of Familial iSGS Pedigrees**

Pedigree 1:

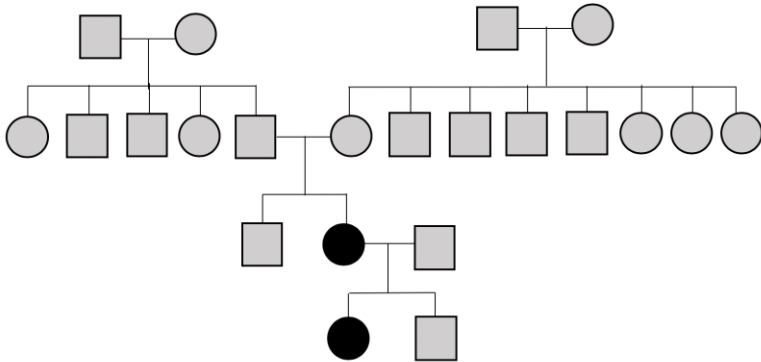

Pedigree 2:

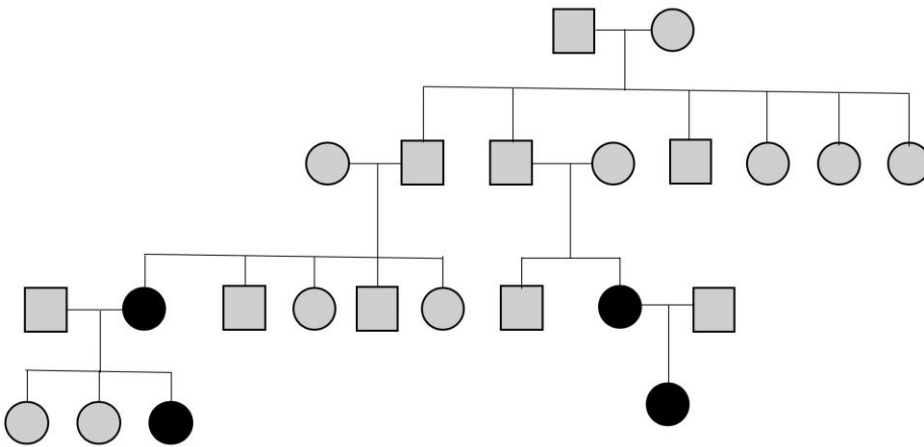

Pedigree 3:

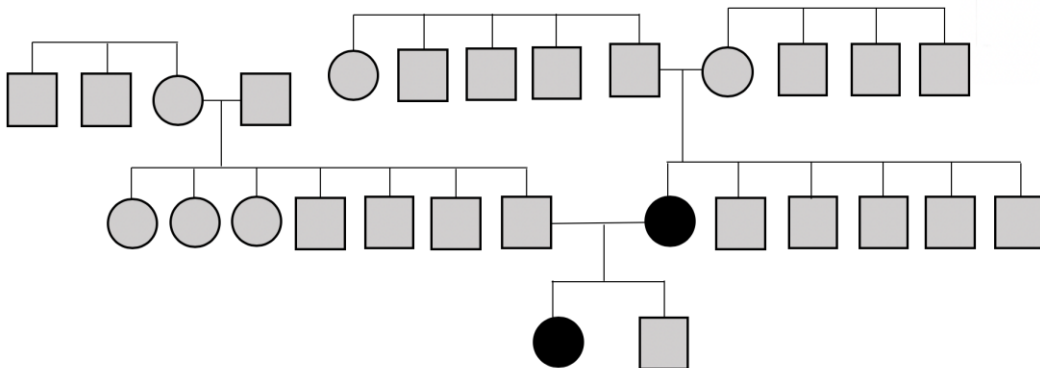

Pedigree 4:

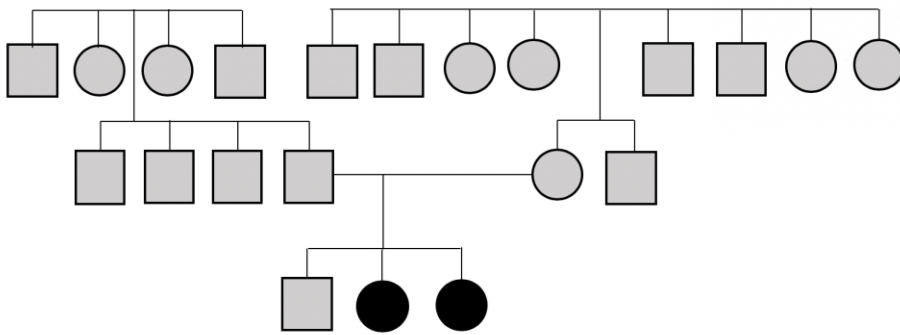

Pedigree 5:

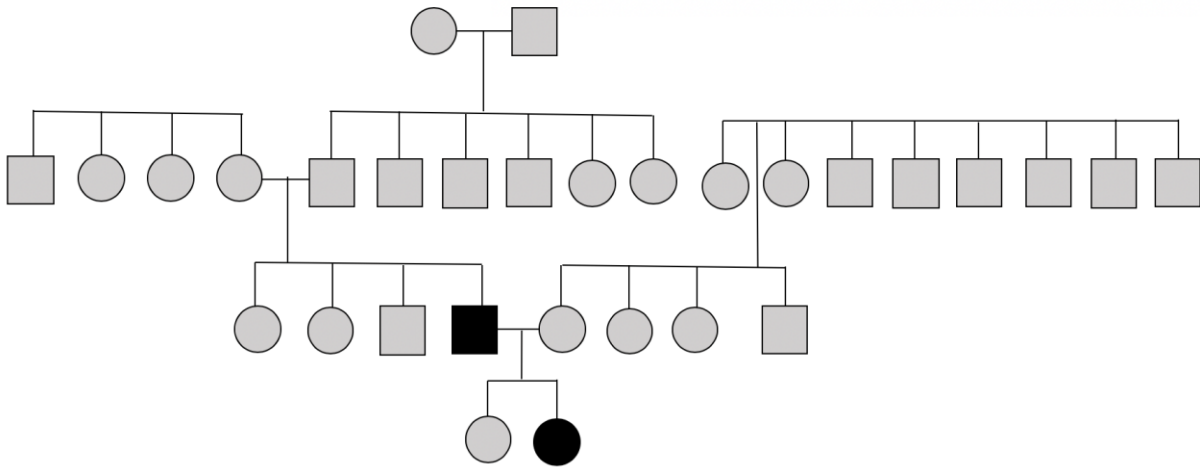

Pedigree 6:

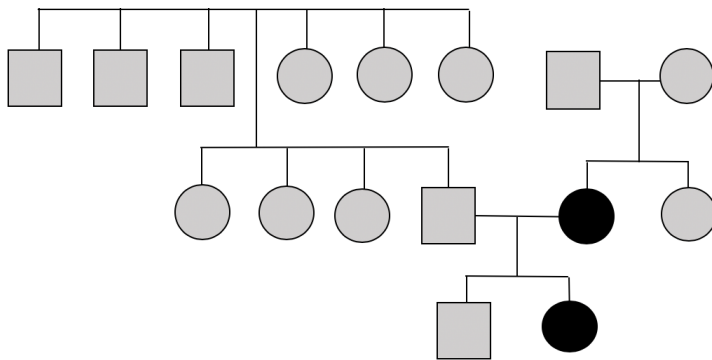

Pedigree 7:

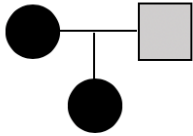

Pedigree 8:

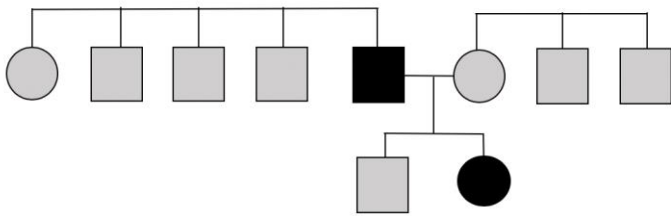

Pedigree 9:

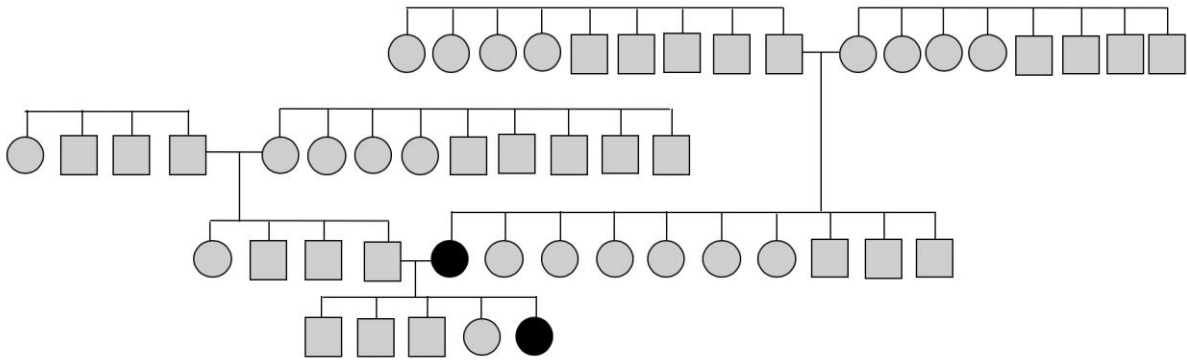

Pedigree 10:

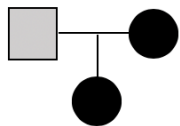

Pedigree 11:

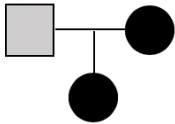

Pedigree 12:

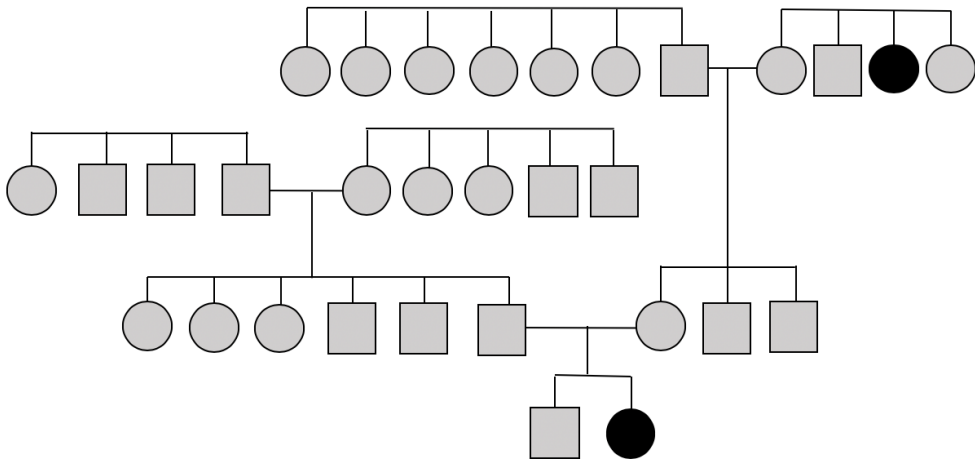

Pedigree 13:

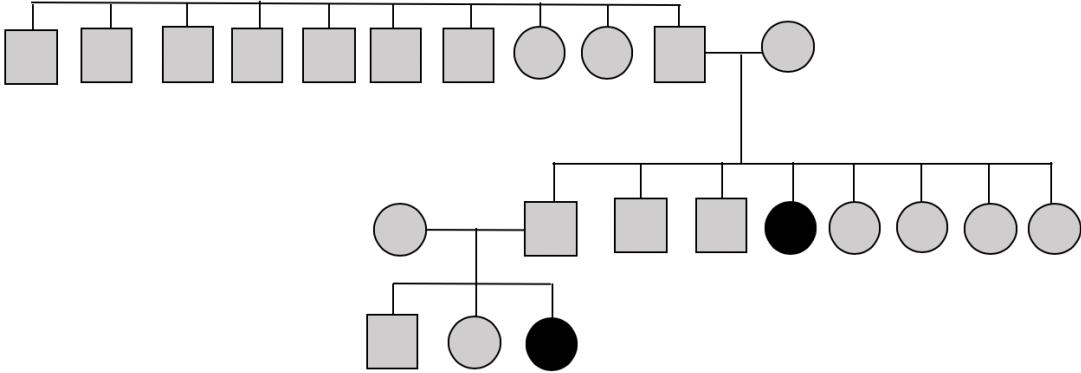

Pedigree 14:

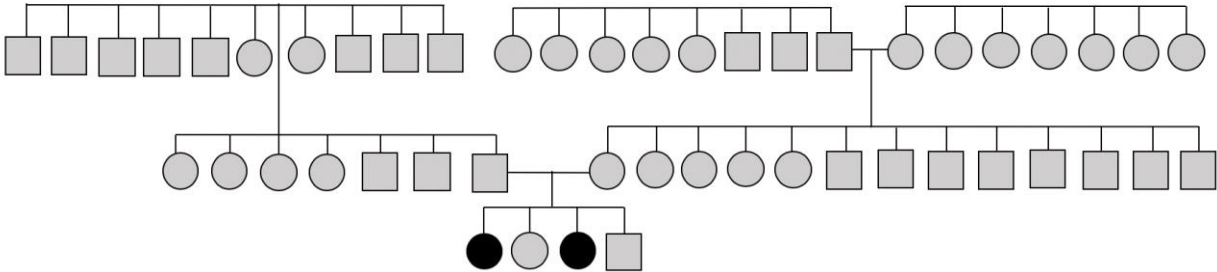

Pedigree 15:

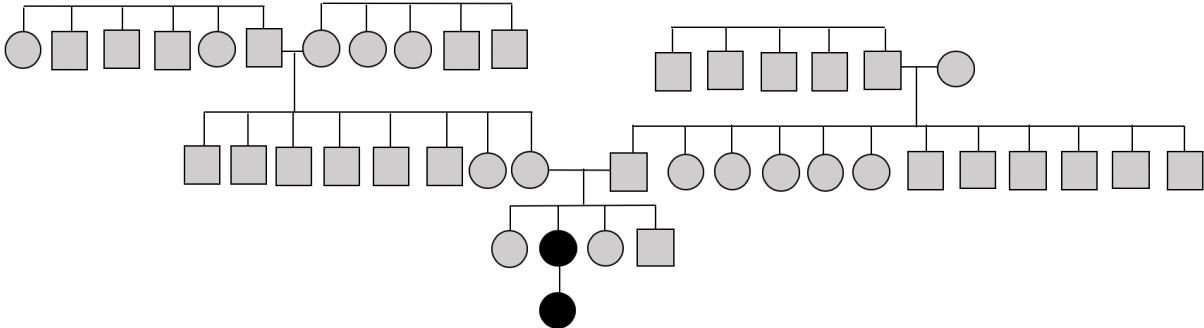

Pedigree 16:

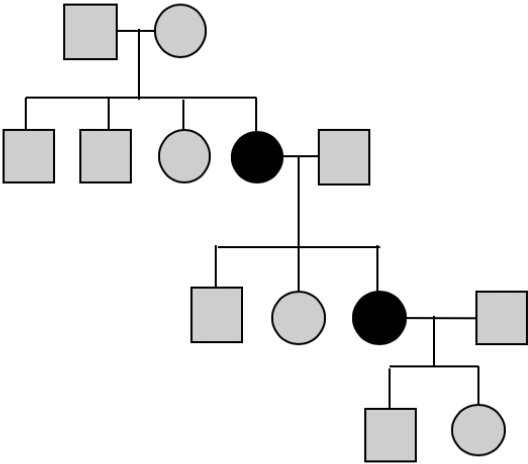

Pedigree 17:

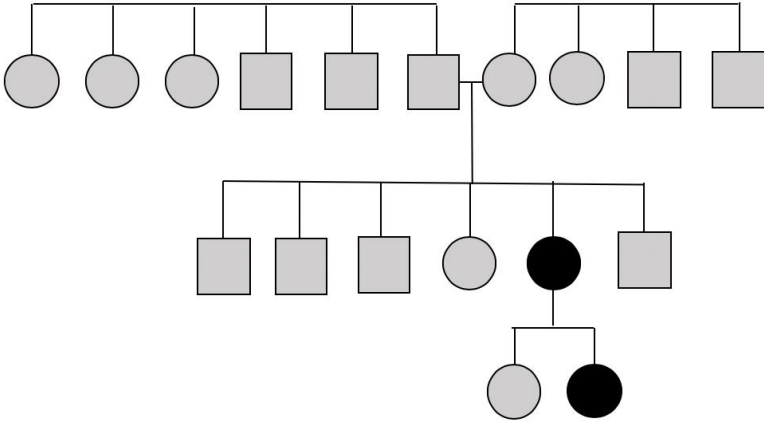

Pedigree 18:

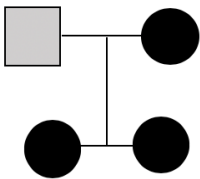

Pedigree 19:

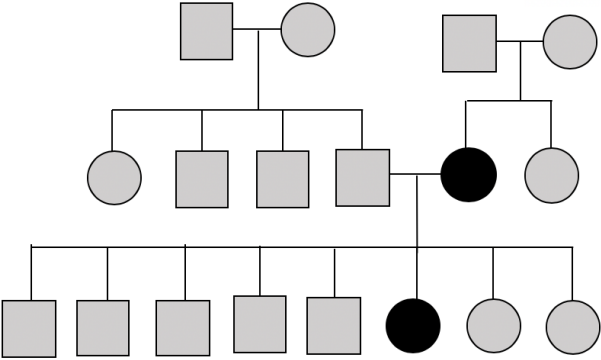

Pedigree 20:

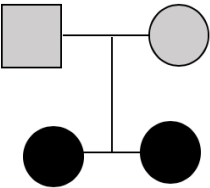

Supplement: NIHMS1659350-supplement-Supplementary__Files.pdf [file NIHMS1659350-supplement-Supplementary__Files.pdf]
